# Supplementary material for: Sex comb on midleg (Scm) is a functional link between PcG-repressive complexes in Drosophila
Source: PubMed Central journal article supplement — Genes Dev. 2015 Jun 1;29(11):1136–50. doi: 10.1101/gad.260562.115 (PMC4470282; doi:10.1101/gad.260562.115), 2015-06-01

**Supplementary Information:**

**Sex comb on midleg (Scm) is a functional link between PcG repressive complexes in  
*Drosophila***

Hyuckjoon Kang<sup>1,2</sup>, Kyle A. McElroy<sup>1-3</sup>, Youngsook Lucy Jung<sup>1,4</sup>, Artyom A. Alekseyenko<sup>1,2</sup>,  
Barry M. Zee<sup>1,2</sup>, Peter J. Park<sup>1,4</sup>, and Mitzi I. Kuroda<sup>1,2\*</sup>

<sup>1</sup>Division of Genetics, Brigham and Women's Hospital, Boston, MA 02115

<sup>2</sup>Department of Genetics, Harvard Medical School, Boston, MA 02115

<sup>3</sup>Department of Molecular and Cellular Biology, Harvard University, Cambridge, MA 02138

<sup>4</sup>Center for Biomedical Informatics, Harvard Medical School, Boston, MA 02115

\*Corresponding author:

Email: [mkuroda@genetics.med.harvard.edu](mailto:mkuroda@genetics.med.harvard.edu); Phone: 617-525-4520; Fax: 617-525-4522

## Supplemental Table Legends

**Table S1. Comparison of repressor complex components co-purified by Pc, E(z) and Scm BioTAP-XL pull-down.** The proteins characterized as belonging to PcG and other repressor complexes are listed along with the total peptide counts recovered from Pc-C-BioTAP, BioTAP-N-E(z) and BioTAP-N-Scm pull-downs in embryos and BioTAP-N-Scm pull-down in S2 cells. Proteins are grouped and color-coded by repressive complexes. The component CoRest is a shared component between the CtBP and LINT complexes. Protein length, in amino acids, is indicated.

**Table S2. Proteins identified after BioTAP-XL mass spectrometry of Pc and E(z) pull-downs in embryos.** All proteins recovered from Pc-C-BioTAP and BioTAP-N-E(z) pull-downs, as well as input and mock, in embryos are listed along with UnitProtKB entry name and the unique & total peptide counts.

**Table S3. Proteins identified after BioTAP-XL mass spectrometry of Scm pull-downs in embryos and S2 cell lines.** All proteins recovered from BioTAP-N-Scm pull-down and input in S2 cells and embryos are listed along with UnitProtKB entry name and the unique & total peptide counts. Two embryonic BioTAP-N-Scm pull-down mass spec results are from technical replicates, and two input mass spec results are from biological replicates.

| Complex | Components | Length | Peptide counts (BioTAP-XL pull-down) |      |     |    |         |
|---------|------------|--------|--------------------------------------|------|-----|----|---------|
|         |            |        | Embryo                               |      |     |    | S2 cell |
|         |            |        | Pc                                   | E(z) | Scm |    | Scm     |
| PRC1    | Psc        | 1601   | 110                                  | 7    | 44  | 43 | 59      |
|         | Su(z)2     | 1368   | 89                                   | 0    | 38  | 33 | 99      |
|         | Sce        | 435    | 67                                   | 2    | 22  | 16 | 46      |
|         | ph-p       | 1589   | 39                                   | 2    | 42  | 20 | 56      |
|         | Pc         | 390    | 27                                   | 6    | 11  | 11 | 12      |
|         | Scm        | 877    | 23                                   | 24   | 93  | 35 | 167     |
|         | ph-d       | 1359   | 17                                   | 0    | 3   | 0  | 5       |
| PRC2    | Su(z)12    | 900    | 4                                    | 113  | 35  | 25 | 80      |
|         | esc        | 425    | 0                                    | 64   | 12  | 8  | 30      |
|         | Nurf55     | 430    | 4                                    | 47   | 16  | 7  | 13      |
|         | Pcl        | 1043   | 0                                    | 45   | 27  | 27 | 55      |
|         | E(z)       | 760    | 0                                    | 44   | 11  | 8  | 17      |
|         | Jarid2     | 2351   | 2                                    | 44   | 0   | 0  | 4       |
|         | jing       | 1582   | 0                                    | 31   | 0   | 0  | 0       |
| escl    | 462        | 0      | 2                                    | 0    | 0   | 6  |         |
| PhoRC   | Pho        | 520    | 2                                    | 6    | 16  | 17 | 18      |
|         | Sfmbt      | 1220   | 13                                   | 1    | 25  | 19 | 27      |
| CtBP    | G9a        | 1637   | 2                                    | 0    | 42  | 38 | 85      |
|         | Rpd3       | 521    | 17                                   | 5    | 12  | 20 | 27      |
|         | Su(var)3-3 | 890    | 0                                    | 0    | 3   | 6  | 20      |
|         | CtBP       | 386    | 18                                   | 9    | 7   | 9  | 13      |
|         | CG9932     | 2171   | 0                                    | 0    | 6   | 14 | 25      |
|         | peb        | 1894   | 2                                    | 0    | 16  | 18 | 0       |
|         | CoRest     | 590    | 4                                    | 0    | 14  | 9  | 39      |
| LINT    | L(3)mbt    | 1477   | 0                                    | 0    | 12  | 17 | 23      |
|         | Lint-1     | 602    | 0                                    | 0    | 4   | 8  | 9       |

## Supplemental Figure Legends

**Figure S1. Validation of Pc-, E(z)- and Scm- BioTAP tagged proteins expressed in transgenic flies.** (A) A BioTAP tag containing 2xProtein A moieties and a Biotinylation accepting sequence was added to the C-terminus of Pc in its genomic context, and a BioTAP tag containing 1xProtein A moiety and the Biotinylation accepting sequence was added to the N-terminus of the E(z) cDNA and Scm in its genomic context. Pc and Scm are expressed under the control of their native promoters and the expression of E(z) is controlled by the  $\alpha$ -tubulin 1 promoter. (B) Western blot analysis of nuclear extracts from embryos expressing BioTAP fusion proteins. Tagged proteins were detected by Peroxidase Anti-peroxidase (PAP) antibody against the Protein A epitope. (C) Polytene chromosome immunostaining from larvae of BioTAP transgenic flies. The BioTAP fusion proteins were detected by PAP antibody (red) in a wild type background, and DNA was counterstained with Hoechst (blue). (D) Viability rescue tests of trans-heterozygotic mutants by BioTAP tagged fusion proteins indicate that the BioTAP-tagged constructs are functional.

**Figure S2. BioTAP-XL purification strategy.** Nuclear extracts from *Drosophila* embryos or cell lines expressing the BioTAP-tagged bait were cross-linked using formaldehyde and sonicated. Tandem affinity purification was performed to minimize non-specific contaminants. The first purification using rabbit IgG-agarose beads was eluted under denaturing conditions (6M Urea and 0.2% SDS) and the subsequent purification was performed using streptavidin-agarose beads. After stringent washing, peptides released by on-bead trypsin digestion were identified by LC-MS/MS and DNA samples were analyzed by high-throughput sequencing.

**Figure S3. Correlations between Scm, E(z), Pc and H3K27me3 in embryos.** (A) Smoothed density scatter plots between BioTAP-N-Scm and BioTAP-N-E(z) (left), Pc-C-BioTAP (middle), or H3K27me3 (modENCODE, ChIP-seq; right). The listed r value is the genome-wide Pearson correlation coefficient using 1 kb bins. Scm is highly correlated with E(z), Pc and H3K27me3 in embryos. Red lines indicate Loess regression lines. (B) Heat map of pairwise genome-wide Pearson correlations between Scm, E(z), Pc and H3K27me3 in embryos.

**Figure S4. Genome-wide BioTAP-N-Scm profile in S2 cells.** (A) Genome browser view of a representative region of Chr3R showing that the BioTAP-N-Scm ChIP-sequencing profile significantly overlaps with Pc-C-BioTAP and H3K27me3 in S2 (Scm and Pc from the current study; H3K27me3 ChIP-chip profile in modENCODE). (B) Correlations between Scm and other factors in S2 cells. Pearson correlation coefficients between Scm and other factors profiled from the modENCODE project show that Scm is most positively correlated with H3K27me3, Pc and E(z) in S2 cells. Please note that the datasets from modENCODE for other factors in S2 cells were generated by ChIP-chip.

**Figure S5. Comparison of binding profiles between BioTAP-fusion Pc & Scm and PcG proteins from modENCODE in S2 cells.** Genome browser shots of PcG proteins and H3K27me3 at the BX-C (Bithorax complex) (A) and at a second representative PcG site, the *wingless* (*wg*) PRE (B) show that BioTAP-fusion Pc and Scm have sharp peaks at PREs and a broad binding pattern beyond PREs, overlapping with H3K27me3 from modENCODE. The positions of genes and their transcript structures are depicted below PcG binding profiles.

**Figure S6. Recruitment of Scm and Pc are independent of each other and of PRC2.** The P{GawB}c729 salivary gland-specific GAL4 line was crossed with Oregon R, UAS-*Pc* shRNA, UAS-*E(z)* shRNA, or UAS-*Scm* shRNA TRiP lines. Polytene chromosomes from the resulting third instar larvae were immunostained with anti-Scm (**A**, **C**, **E**, and **G**) or anti-Pc (**B**, **D**, **F**, and **H**) (red) and DNA was counterstained with Hoechst (blue). Compared to wild-type (**A** and **B**), induction of *Pc* or *Scm* RNAi leads to significant decrease of each cognate protein on polytene chromosomes, respectively (**D** and **G**). However, *Pc* and *E(z)* knockdowns do not result in significant depletion of Scm binding on polytene chromosomes (**C** and **E**), although increased variability of the immunostaining after RNAi was observed. The independence of binding is similar for Pc. Pc still strongly binds at several sites after induction of *E(z)* and *Scm* RNAi. (**F** and **H**).

**Figure S7. The effects of RNAi knockdown of Scm, Pc, and E(z) on H3K27me3 distribution on polytene chromosomes.** The P{GawB}c729 salivary gland-specific GAL4 line was crossed with (**A**) Oregon R, (**B**) UAS-*E(z)* shRNA, (**C**) UAS-*Pc* shRNA, or (**D**) UAS-*Scm* shRNA TRiP lines. Polytene chromosomes from the resulting third instar larvae were immunostained with anti-H3K27me3 (green). DNA was counter-stained with Hoechst (blue). (**E**) H3K27me3 binding pattern on wild-type chromosome 3R shows strong labeling bands of H3K27me3 between cytogenetic map 89D (Bithorax complex region) and 100A. (**F**) The strong band signals shown in (**E**) are decreased and weak bands are concomitantly strengthened in *Scm* RNAi. Dashed lines connect the same cytogenetic map sites between wild-type and *Scm* RNAi.

**Figure S8. Induction of *Scm* RNAi in the posterior compartment of the wing imaginal disc does not affect H3K27me3 levels.** After induction of *Scm* RNAi (**A-F**) or *E(z)* RNAi (**G-I**) driven by *engrailed* (*en*)-GAL4, wing imaginal discs were labeled with Hoechst (**A,D**, and **G**) and antibodies against *Scm* (**C**) or H3K27me3 (**F** and **I**). Expression of GFP marks the posterior compartment where *Scm* knockdown (**B** and **E**) or *E(z)* knockdown (**H**) is induced. *Scm* RNAi results in a decrease in *Scm* levels (**C**) but no detectable change in H3K27me3 levels (**F**), whereas *E(z)* RNAi compromises the morphology of wing discs and causes the depletion of H3K27me3 (**I**).

**Figure S9. The effects of overexpressed *Scm*-SAM domain on PcG proteins and H3K27me3 distributions on polytene chromosomes.** The P{GawB}c729 GAL4 line was crossed with Oregon R or the UAS-SAM transgenic line, and polytene chromosomes were immunostained with anti-Pc (**A** and **B**) (red), anti-H3K27me3 (**C** and **D**) (green), and anti-*E(z)* (**E** and **F**) (green). DNA was counterstained with Hoechst. Overlays of the antibody staining and DNA are shown in **A-D**. For clarity, the anti-*E(z)* immunostaining is presented alone, with the corresponding Hoechst stain inlaid over the image. Left panels (**A**, **C**, and **E**) show wild-type distributions of target proteins or modifications detected by the indicated antibodies. (**B**) Pc binding is still observed after overexpression of the *Scm*-SAM domain. (**D**) Overexpression of SAM results in redistribution of H3K27me3 such as strong labeling of the chromocenter and changes in the distribution of signal of strong and weak bands, much like the effect of *Scm* knockdown. (**F**) Significant depletion of *E(z)* bands is caused by the overexpressed SAM domain, though two *E(z)* bands on average are consistently observed, in contrast with *Scm* knockdown where none remain (Fig 4D).

A

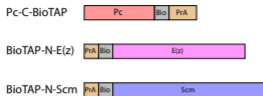

B

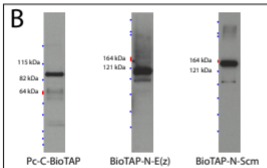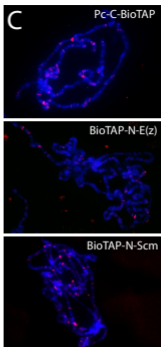

D

| Experimental cross                                                                                      | Genotype                                                                        | Expected mendelian proportion of F1 with this genotype | Observed proportion of viable F1 with this genotype |
|---------------------------------------------------------------------------------------------------------|---------------------------------------------------------------------------------|--------------------------------------------------------|-----------------------------------------------------|
| Pc<br>w ; P{w <sup>+</sup> ,Pc-C-BioTAP}/+ ; Pc <sup>1</sup> /TM2<br>X w ; +/+ ; Pc <sup>1</sup> /TM6B  | w ; P{w <sup>+</sup> ,Pc-C-BioTAP}/+ ; Pc <sup>1</sup> /Pc <sup>1</sup>         | 0.143                                                  | 0.119                                               |
| w ; P{w <sup>+</sup> ,Pc-C-BioTAP}/+ ; Pc <sup>1</sup> /TM2<br>X w ; +/+ ; Pc <sup>1</sup> /TM6B        | w ; P{w <sup>+</sup> ,Pc-C-BioTAP}/+ ; Pc <sup>1</sup> /Pc <sup>2</sup>         | 0.143                                                  | 0.181                                               |
| E(z)<br>w ; P{w <sup>+</sup> ,BioTAP-N-E(z)}/+ ; E(z) <sup>10</sup> /TM3<br>X w ; +/+ ; Df(3L)1xd15/TM3 | w ; P{w <sup>+</sup> ,BioTAP-N-E(z)}/+ ; E(z) <sup>10</sup> /Df(3L)1xd15        | 0.2                                                    | 0.09                                                |
| w ; P{w <sup>+</sup> ,BioTAP-N-E(z)}/+ ; E(z) <sup>12</sup> /TM3<br>X w ; +/+ ; E(z) <sup>10</sup> /TM3 | w ; P{w <sup>+</sup> ,BioTAP-N-E(z)}/+ ; E(z) <sup>12</sup> /E(z) <sup>11</sup> | 0.2                                                    | 0.29                                                |
| Scm<br>w ; P{w <sup>+</sup> ,BioTAP-N-Scm}/+ ; Scm <sup>10</sup> /TM3<br>X w ; +/+ ; Df(3R)BSC468/TM6C  | w ; P{w <sup>+</sup> ,BioTAP-N-Scm}/+ ; Scm <sup>10</sup> /Df(3R)BSC468         | 0.143                                                  | 0.232                                               |



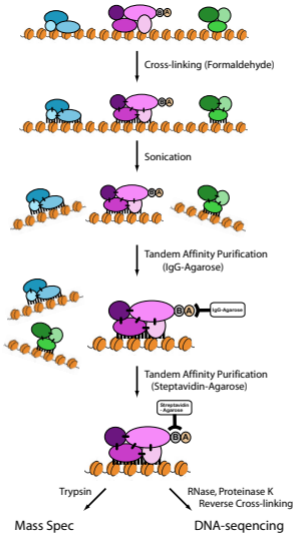

A

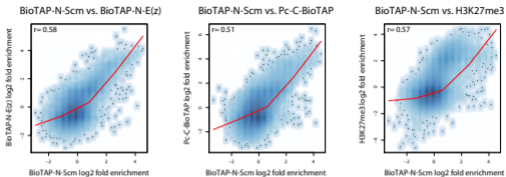

B

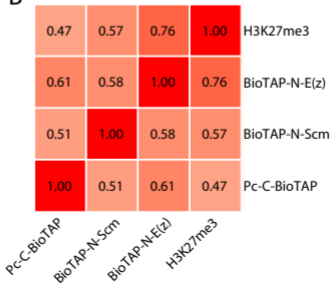



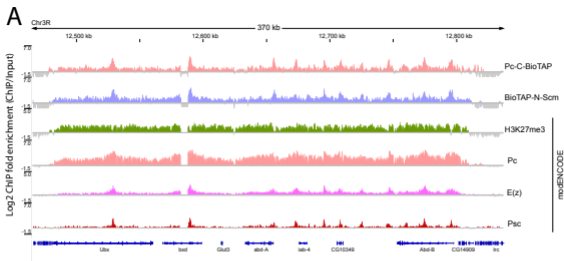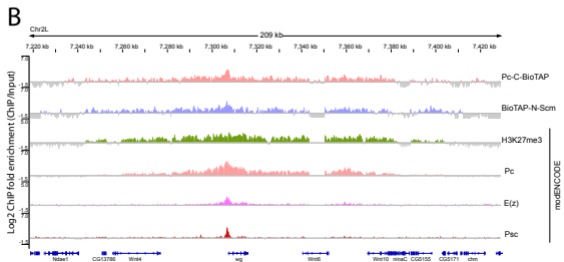

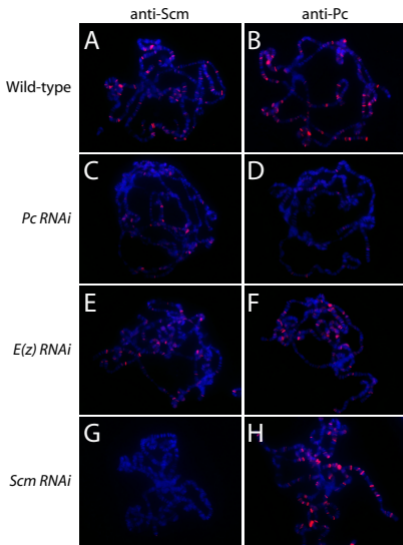

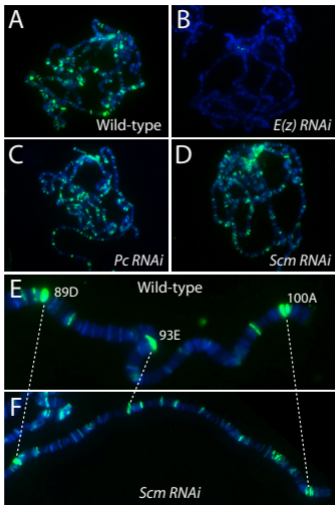

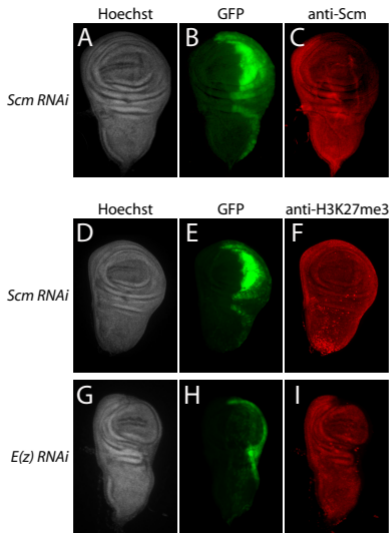

Wild-type

Overexpression of SAM

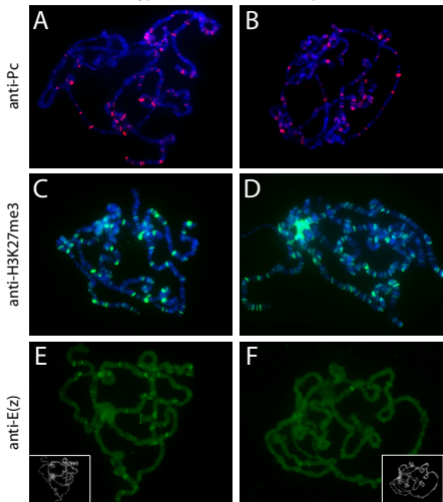

Supplement: supp_29.11.1136_Supplemental_Material_TableS1.pdf [file supp_29.11.1136_Supplemental_Material_TableS1.pdf]
